# Supplementary material for: Hypoxia-inducible Factor-1α (HIF1α) Switches on Transient Receptor Potential Ankyrin Repeat 1 (TRPA1) Gene Expression via a Hypoxia Response Element-like Motif to Modulate Cytokine Release
Source: PubMed Central journal article supplement (PMC3442528; doi:10.1074/jbc.m112.361139), 2012-07-26

## SUPPLEMENTAL DATA

HIF1 $\alpha$  switches on TRPA1 gene expression via a hypoxia response element-like motif to modulate cytokine release

**Noriyuki Hatano, Yuka Itoh, Hiroka Suzuki, Yukiko Muraki, Hidetoshi Hayashi, Kikuo Onozaki, Ian C Wood, David J Beech, Katsuhiko Muraki**

## SUPPLEMENTARY METHODS

*Reverse Transcription-PCR-* Oligonucleotide sequences of primers specific for human *TRPA1* and  $\beta$ -actin (sense and antisense: 5' to 3') were TGCATGTTGCATTCCACAGAAG and TTGAGGGCTGTAAGCGGTTTCATA (140 bp), and ACCGAGCGCGGCTACA and CAGCCGTGGCCATCTCTT (112 bp), respectively.

*Quantitative PCR-* Oligonucleotide sequences of primers specific for human *TRPA1*, *HIF1 $\alpha$* , *HIF2 $\alpha$* , *IL6*, *IL8* and  $\beta$ -actin (sense and antisense: 5' to 3') were TGCATGTTGCATTCCACAGAAG and TTGAGGGCTGTAAGCGGTTTCATA, and GTAGTGCTGACCCTGCACTCAA, CCATCGGAAGGACTAGGTGTCT, CAATCAGCTTCCTGCGAACAC and GGTCACCACGGCAATGAAA, TCCAGGAGCCCAGCTATGAA and CCCAGGGAGAAGGCAACTG, CTGGCCGTGGCTCTCTTG and TTAGCACTCCTTGGCAAACACTG and, ACCGAGCGCGGCTACA and CAGCCGTGGCCATCTCTT, respectively.

*Chromatin immunoprecipitation-* PCR primers for detection of sites recognized by probe1 (sense and antisense primer starts at -5,698 and -5,591, respectively, from TSS:-5698S/-5591A), probe2 (-4263S/-4101A), probe3 (-553S/-352A), and probe4 (+902S/+1085A) were GAAAATTAAGCAACAGAGTTCC and CTCAACTTTACAGTAGCTGCATTTC, CAAAGCACTGCTGAGAGAATCAA and TTGATGGCTGATGAAGCATTGT, GTCCCTCAAACAGTGCTAGG and GAGGAAGAGGGAATGACTGGGT, and TCTATTACTTATGCAGTTATCGGACCTAA and ATGAGGGTTTGGAGAGACCTTTTT, respectively.

## SUPPLEMENTARY FIGURE LEGENDS

**Figure S1.** Inflammatory induction of TRPA1 and pharmacological characteristics of the induced-TRPA1. (A, B) Peak  $\Delta\text{Ca}^{2+}_i$  response elicited by cumulative application of 15d-PGJ<sub>2</sub> (A) or ZnCl<sub>2</sub> (B) in synoviocytes with (mean $\pm$ s.e.m, n=56 and n=27 for 15d-PGJ<sub>2</sub> and ZnCl<sub>2</sub>, three and two independent experiments) and without 10 U TNF $\alpha$  for 24 h (CT, mean $\pm$ s.e.m, n=39 and n=45 for 15d-PGJ<sub>2</sub> and ZnCl<sub>2</sub>, three and two independent experiments). (C, D) Effects of TRPA1 channel blockers on MO-induced peak  $\Delta\text{Ca}^{2+}_i$  response in synoviocytes with 10 U TNF $\alpha$  and 100 U IL1 $\alpha$  for

24 h. Cells were exposed to 30  $\mu$ M MO before and after application of 10  $\mu$ M HC (C, mean $\pm$ s.e.m, \*\* $p$ <0.01; n=43 for each, two independent experiments for each) or 10  $\mu$ M RuR (D, mean $\pm$ s.e.m, \*\* $p$ <0.01; n=43 for each, two independent experiments for each). (E) Time-dependent change in expression of *TRPA1* mRNA by TNF $\alpha$ . Synoviocytes were exposed to 10 U TNF $\alpha$  for 0, 8, 24, 48, and 72 h (mean $\pm$ s.e.m, \* $p$ <0.05 and \*\* $p$ <0.01 vs. 0 h; n=4 for each).

**Figure S2.** Expression of HIF2 $\alpha$  in inflammatory synoviocytes. (A, B) *HIF2 $\alpha$*  mRNA expression in synoviocytes. Cells were exposed to 10 U TNF $\alpha$  (A, mean $\pm$ s.e.m, \*\* $p$ <0.01 vs. 0 h; n=4 for each) or 100 U IL1 $\alpha$  (B, mean $\pm$ s.e.m, \*\* $p$ <0.01 vs. 0 h; n=5) for 0, 2, 6, 12, and 24 h. (C) HIF2 $\alpha$  protein expression. Synoviocytes were exposed to 10 U TNF $\alpha$  or 100 U IL1 $\alpha$  for 6 h. Molecular weights of markers are shown on the left; HIF2 $\alpha$  and  $\beta$ -actin proteins are indicated. As a control, HIF2 $\alpha$  protein expressed in HEK cells (HEK-HIF2 $\alpha$ ) was immunoblotted in left panel. The result is representative of five independent experiments.

**Figure S3.** Binding of p65 to *TRPA1* gene. (A) Partial *TRPA1* gene showing six potential p65 binding sites (RelA1-6, GGGRNNYYCC, R=A or G, Y=C or T) and TSS. Numbers refer to the distance in nucleotides from TSS. Arrows indicate DNA fragments amplified by each primer set (probe1-4). (B) ChIP data from synoviocytes treated with 10 U TNF $\alpha$  for 6 h showing the amount of DNA fragments precipitated by anti-p65 antibody against the nonspecific binding of control IgG antibody (mean $\pm$ s.e.m, \* $p$ <0.05; n=4 for each). Each black and white column shows paired experiments.

**Figure S4.** HIF1 $\alpha$ - and p65-dependent promoter activity of *TRPA1* promoter reporter constructs. (A) Comparison of luciferase activity driven from four *TRPA1* reporters. Luciferase activity of each reporter (pro6130, pro5948, pro2253, and pro1195) normalized to the  $\beta$ -galactosidase activity in the same sample is expressed relative to the empty without DFO (mean $\pm$ s.e.m, n=6 for each). (B) Luciferase activity driven from three *TRPA1* reporters with (pro6130) and without RelA1 (pro5948), and without any RelAs (pro367) transfected into HEK cells; expression, normalized to the  $\beta$ -galactosidase activity in the same sample, is expressed relative to the empty (mean $\pm$ s.e.m, n=6 for each).

**Figure S5.** Biological importance of induction of TRPA1 in inflammation. (A, B) No inhibitory effects of MO and HC on IL1 $\alpha$ -induced *IL6* (A) and *IL8* mRNA expression (B). Synoviocytes were exposed to 100 U IL1 $\alpha$  with the solvent (DM), 10  $\mu$ M MO, 30  $\mu$ M HC, and 10  $\mu$ M MO plus 30  $\mu$ M HC for 24 h (mean $\pm$ s.e.m, n=4 for each). CT indicates basal expression of *IL6* and *IL8* mRNA in synoviocytes without IL1 $\alpha$ . (C) Effect of TPEN (30  $\mu$ M) on Ca<sup>2+</sup><sub>i</sub> responses induced by 100 nM BK in synoviocytes; mean summary data of peak  $\Delta$ Ca<sup>2+</sup><sub>i</sub> response with and without TPEN are shown (mean $\pm$ s.e.m., n=24 and n=30 for con and TPEN, three independent experiments for each).

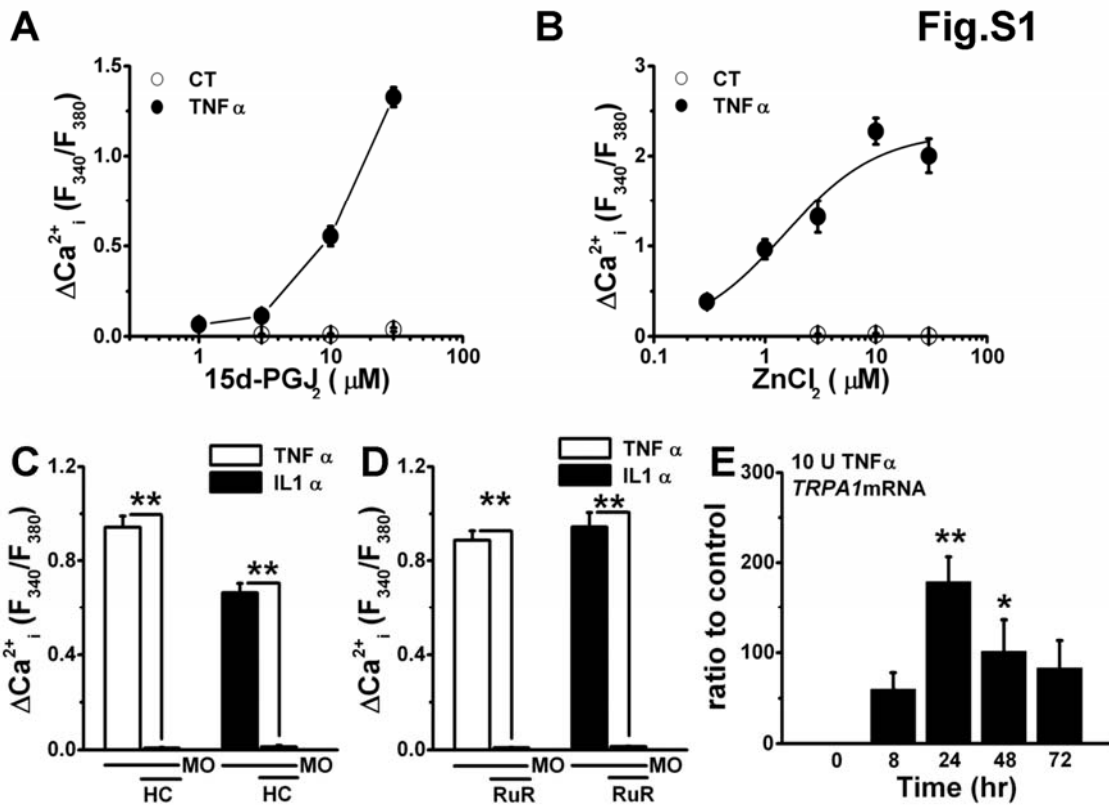

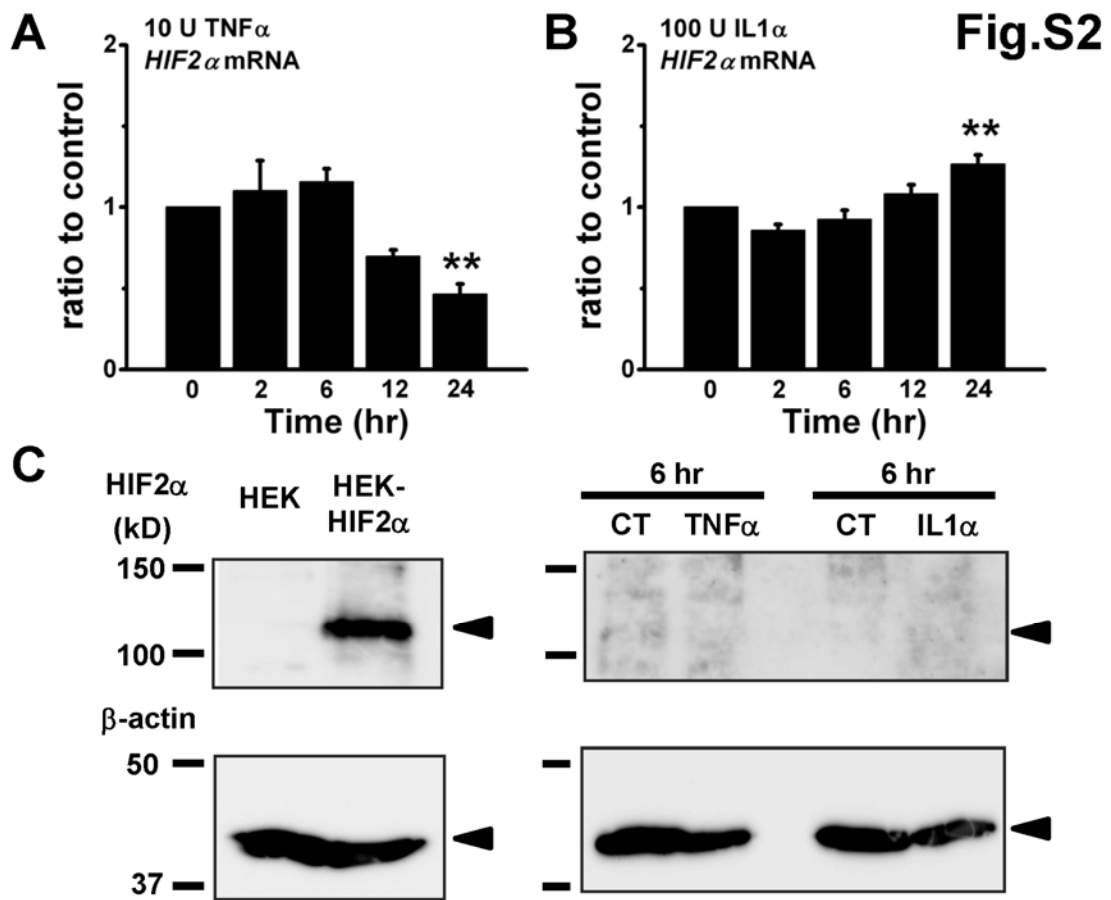

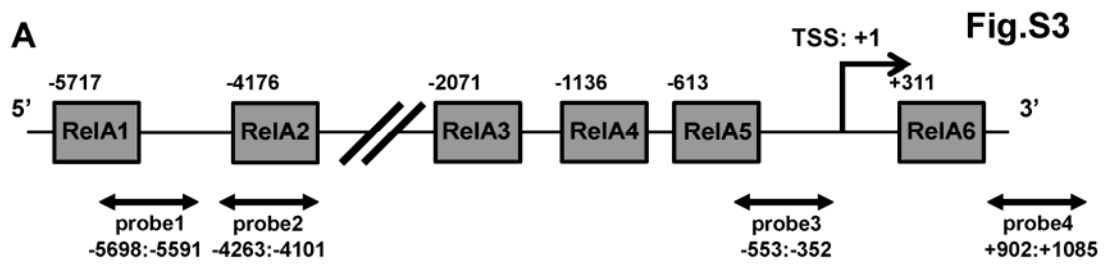

**Fig.S3**

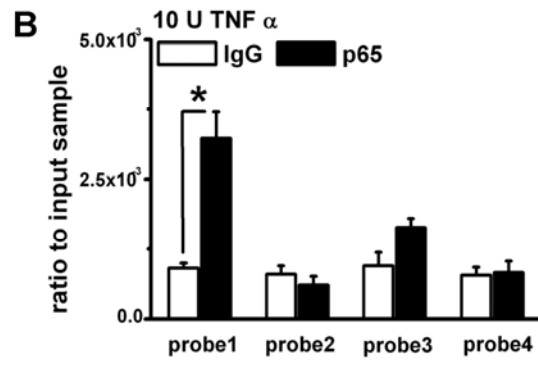

Fig.S4

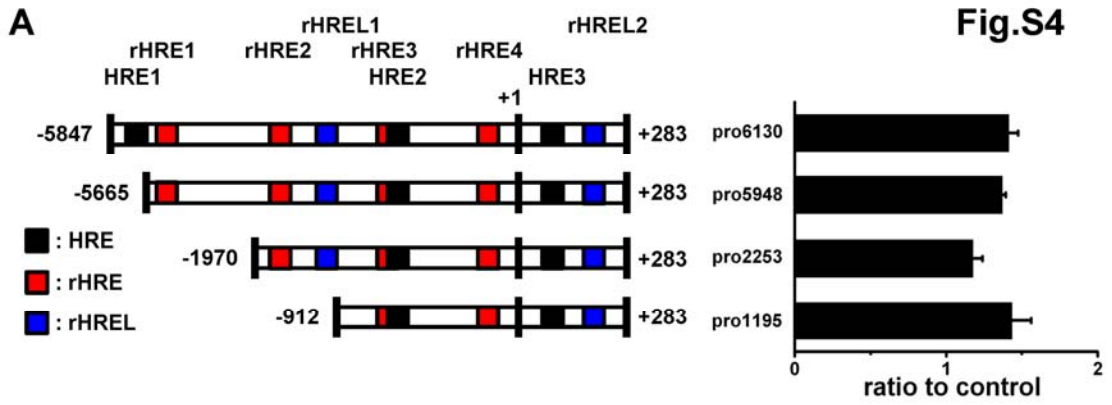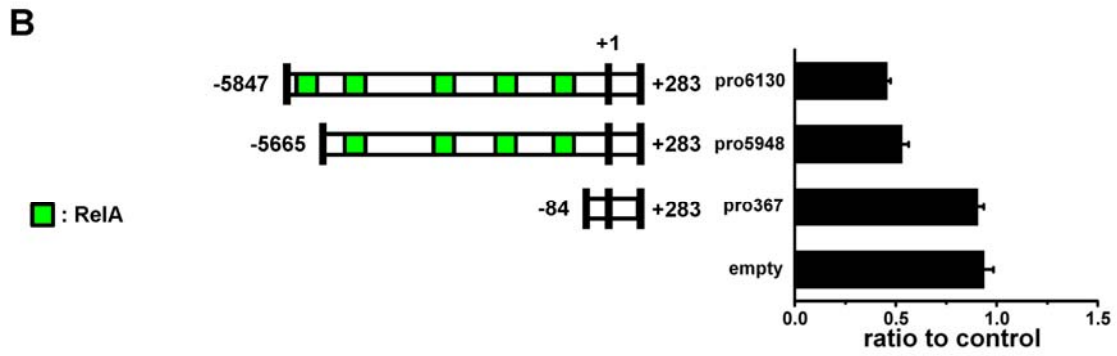

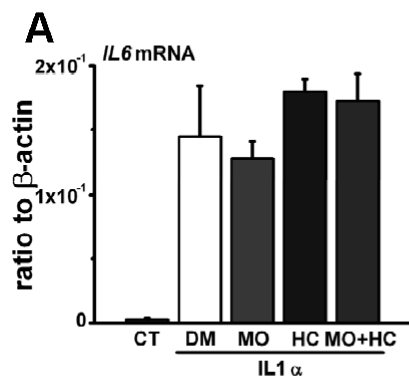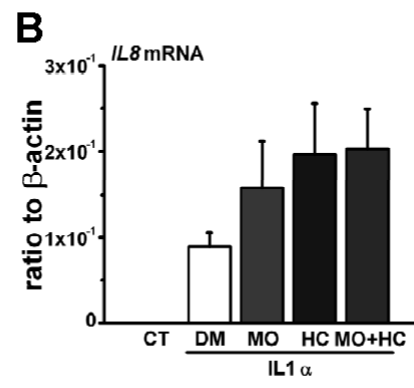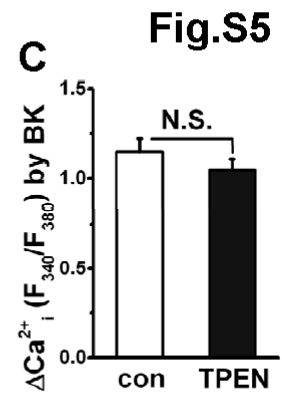

Supplement: supp_M112.361139_jbc.M112.361139-1.pdf [file supp_M112.361139_jbc.M112.361139-1.pdf]
